# Supplementary material for: The microRNAs miR-200b-3p and miR-429-5p target the LIMK1/CFL1 pathway to inhibit growth and motility of breast cancer cells
Source: PubMed Central journal article supplement (PMC5689609; doi:10.18632/oncotarget.19205), 2017-07-12
Supplement: oncotarget-08-85276-s001.pdf [file oncotarget-08-85276-s001.pdf]

## The microRNAs miR-200b-3p and miR-429-5p target the LIMK1/CFL1 pathway to inhibit growth and motility of breast cancer cells

### SUPPLEMENTARY MATERIALS

**Supplementary Table 1: Expression of miR-200b-3p and miR-429-5p in breast cancer tissue and cell lines, based on publications in PubMed**

| Study PMID | Sample type | MiR-200b-3p expression | MiR-429-5p expression |
|------------|-------------|------------------------|-----------------------|
| 22964023   | Tissue      | Low                    | -                     |
| 23372687   | Tissue      | High                   | -                     |
| 25639535   | Tissue      | Low                    | -                     |
| 26201425   | Tissue      | Low                    | -                     |
| 24447584   | Tissue      | Low                    | Low                   |
| 26062653   | Cell line   | Low                    | Low                   |
| 18376396   | Cell line   | Low                    | Low                   |
| 20390345   | Cell line   | Low                    | -                     |
| 22562546   | Cell line   | Low                    | -                     |
| 24447584   | Cell line   | Low                    | -                     |
| 24925028   | Cell line   | Low                    | -                     |
| 25886595   | Cell line   | Low                    | -                     |
| 25639535   | Cell line   | Low                    | -                     |

The search terms were “miR-200b AND breast” or “miR-429 AND breast” in PubMed database. The expression of miR-200b-3p and miR-429-5p was calculated individually based on each cited publication.
